# Supplementary material for: No difference in patient-reported satisfaction after 12 months between customised individually made and off-the-shelf total knee arthroplasty
Source: PubMed Central journal article supplement (PMC9418302; doi:10.1007/s00167-022-06900-z), 2022-02-12

KSS

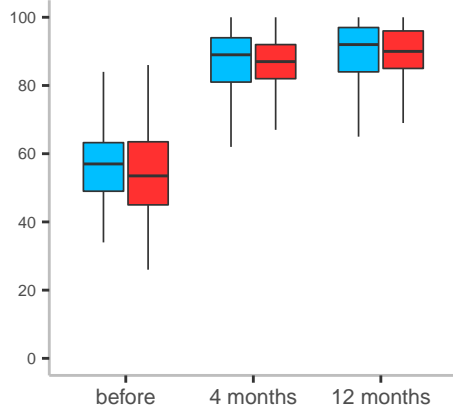

KOOS symptoms

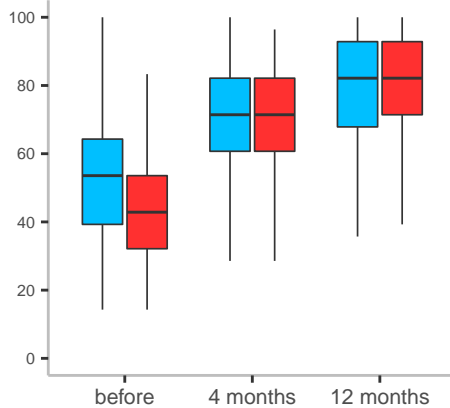

KOOS pain

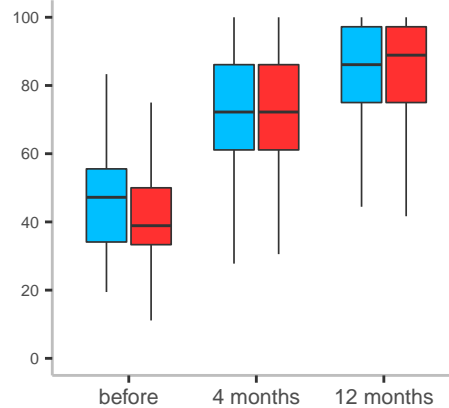

KOOS daily living

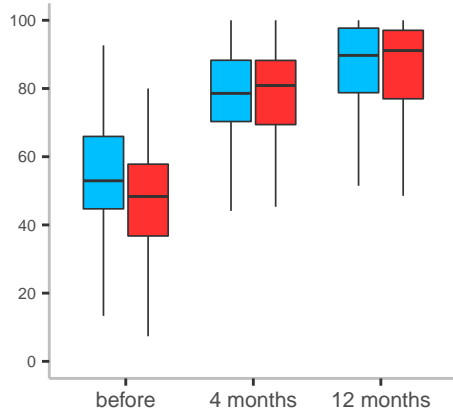

KOOS sports

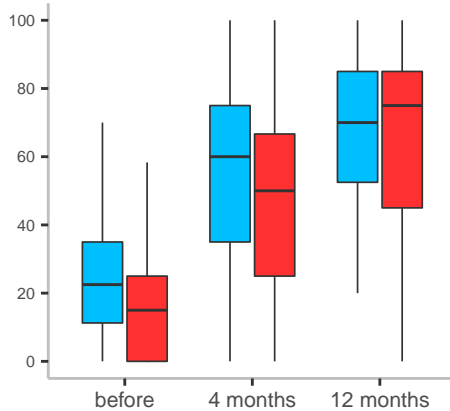

KOOS quality of life

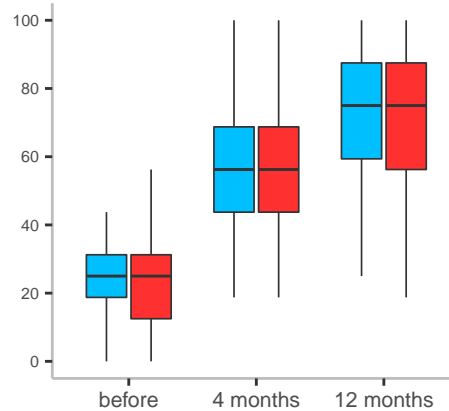

FJS-12

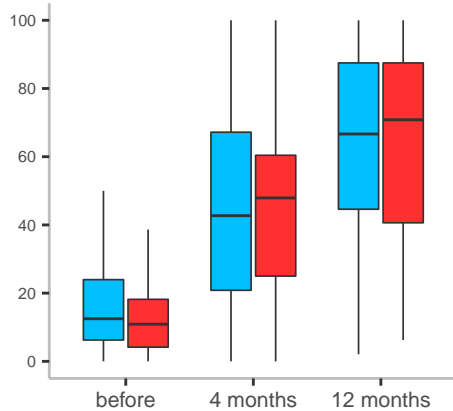

EQ-5D-3L

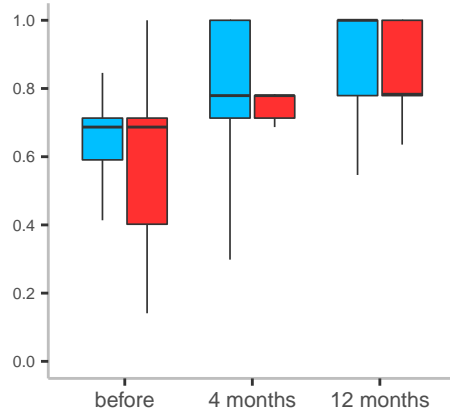

EQ-VAS

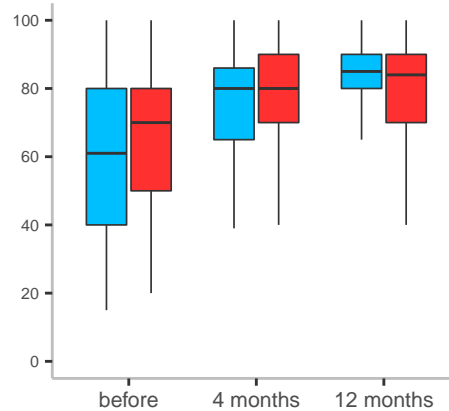

Supplement: 167_2022_6900_MOESM2_ESM.pdf [file 167_2022_6900_MOESM2_ESM.pdf]
