# Supplementary material for: No difference in patient-reported satisfaction after 12 months between customised individually made and off-the-shelf total knee arthroplasty
Source: PubMed Central journal article supplement (PMC9418302; doi:10.1007/s00167-022-06900-z), 2022-02-12

**KSS**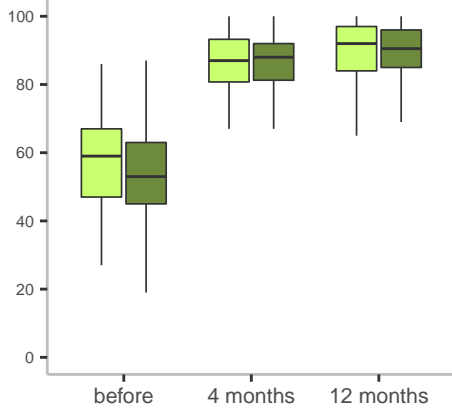**KOOS symptoms**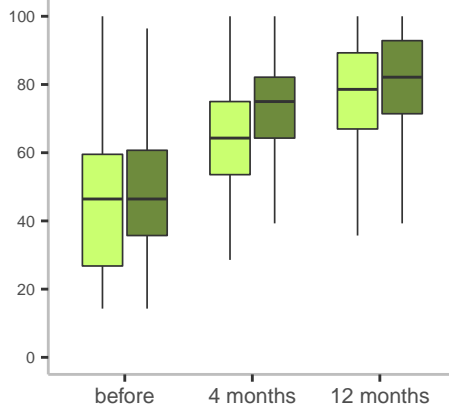**KOOS pain**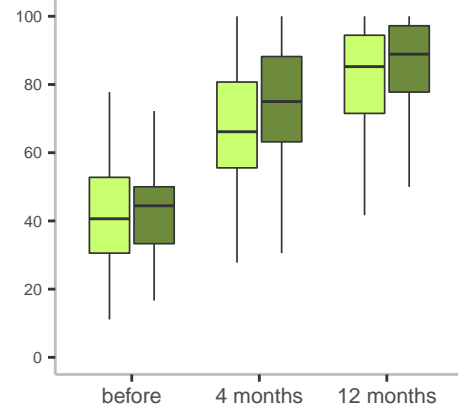**KOOS daily living**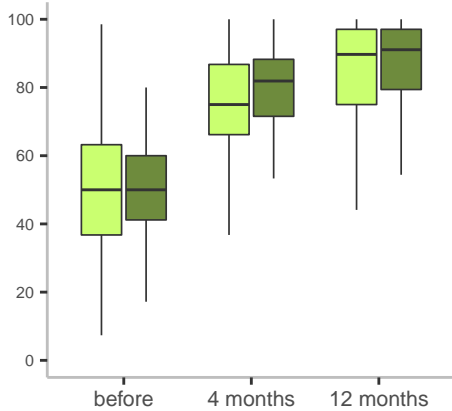**KOOS sports**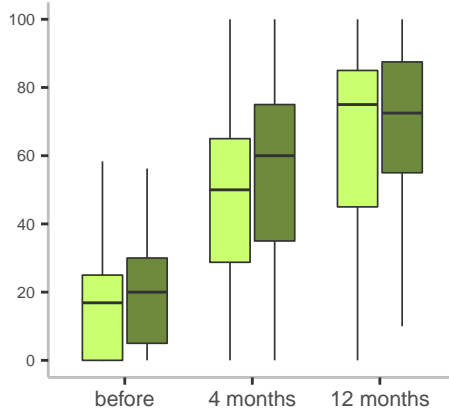**KOOS quality of life**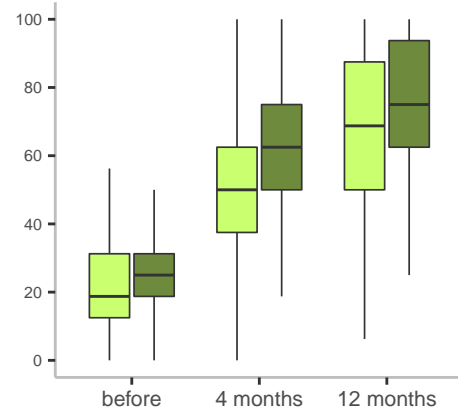**FJS-12**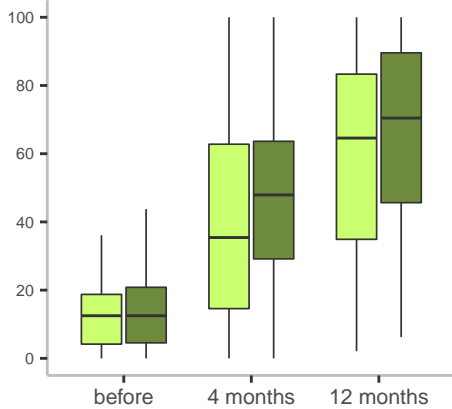**EQ-5D-3L**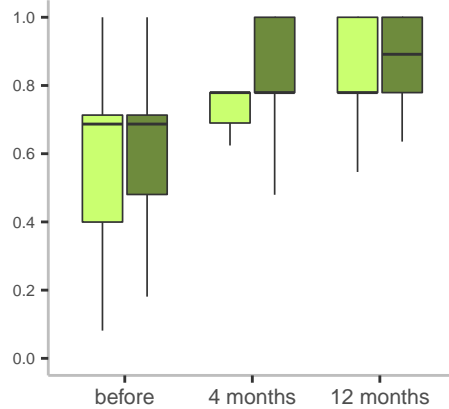**EQ-VAS**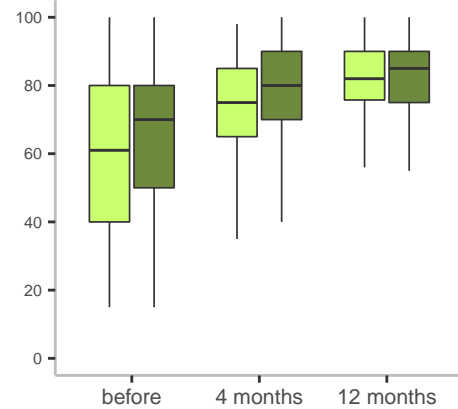

Supplement: 167_2022_6900_MOESM3_ESM.pdf [file 167_2022_6900_MOESM3_ESM.pdf]
